# Supplementary material
Source: MDPI journal article supplement (https://www.mdpi.com/1424-8247/16/12/1651)

# **Triphenylphosphine Derivatives of Allylbenzenes Express Antitumor and Adjuvant Activity When Solubilized with Cyclodextrin-Based Formulations**

**Igor D. Zlotnikov <sup>1</sup>, Sergey S. Krylov <sup>2</sup>, Marina N. Semenova <sup>3</sup>, Victor V. Semenov <sup>2</sup> and Elena V. Kudryashova <sup>1,\*</sup>**

<sup>1</sup> Faculty of Chemistry, Lomonosov Moscow State University, Leninskie Gory, 1/3, 119991 Moscow, Russia; zlotnikovid@my.msu.ru

<sup>2</sup> N. D. Zelinsky Institute of Organic Chemistry RAS, 47 Leninsky Prospect, 119991 Moscow, Russia

<sup>3</sup> N. K. Koltzov Institute of Developmental Biology RAS, 26 Vavilov Street, 119334 Moscow, Russia

\* Correspondence: helenakoudriachova@yandex.ru

**Figure S1.**  $^1\text{H}$  NMR spectra of (a) dillapiol, (b) dillapiol- $\text{PPh}_3$ , (c) myristicin, (d) myristicin- $\text{PPh}_3$ . T = 25  $^\circ\text{C}$ .  $\text{d}_6$ -DMSO. 400 MHz.

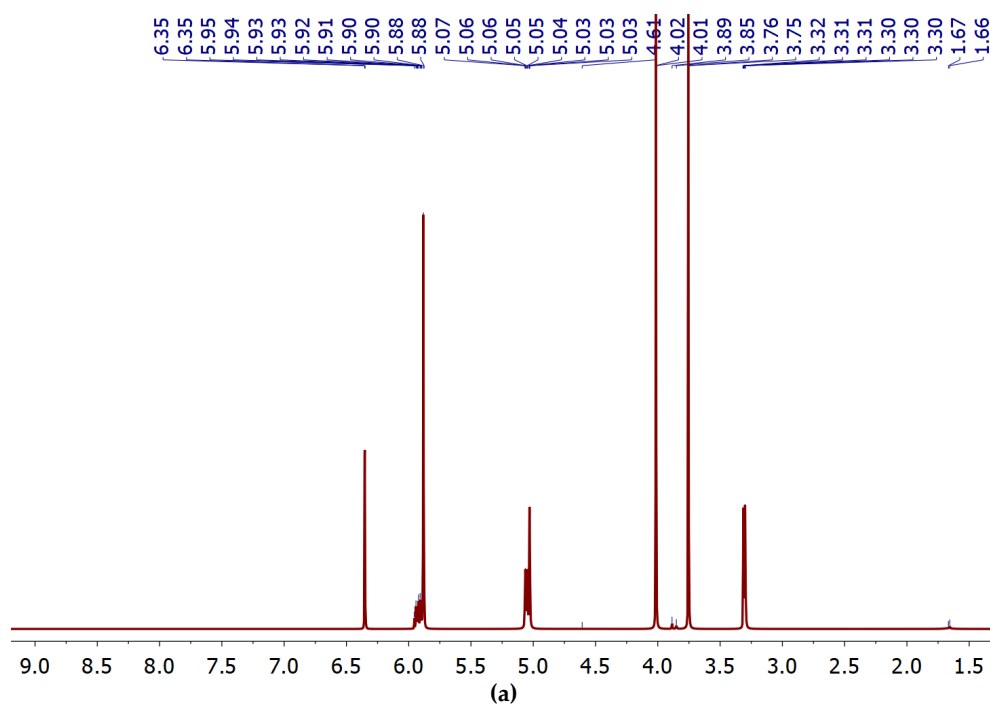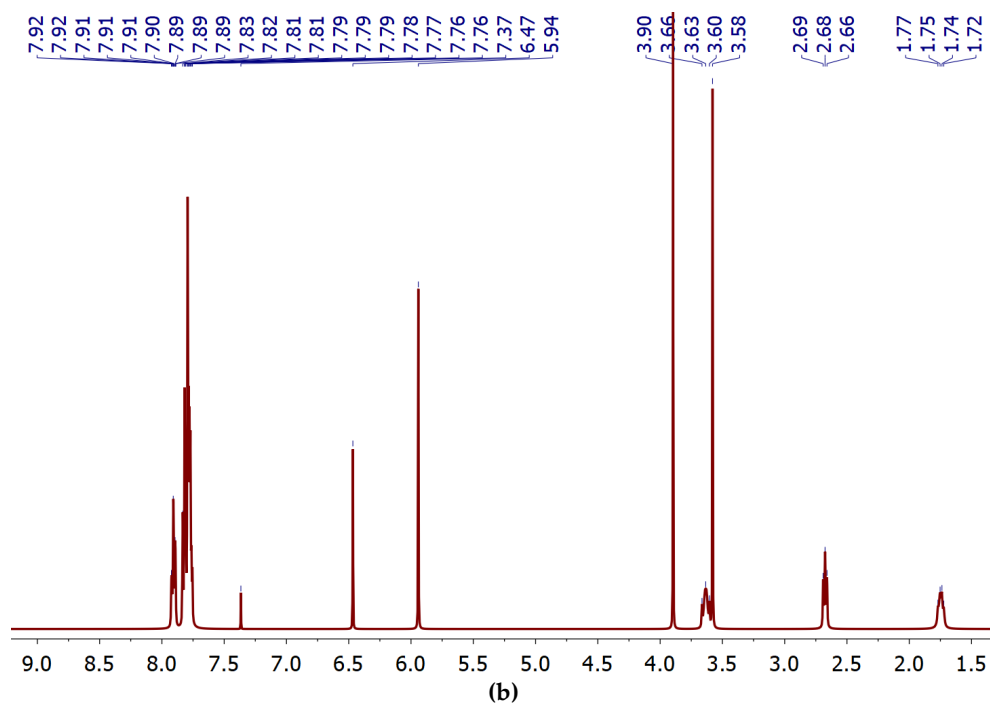

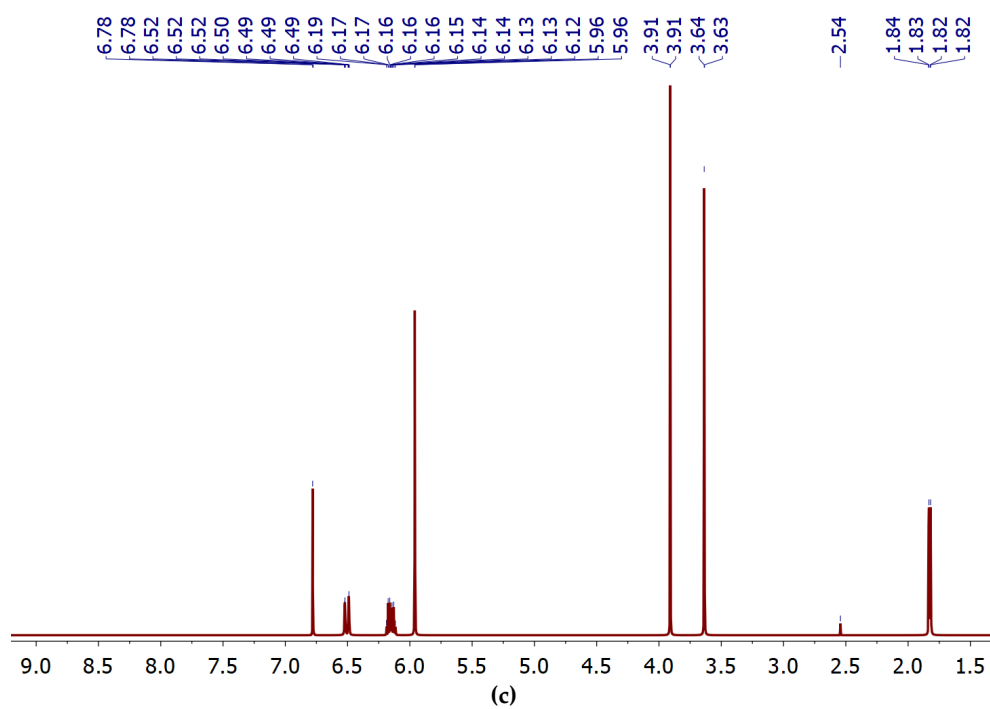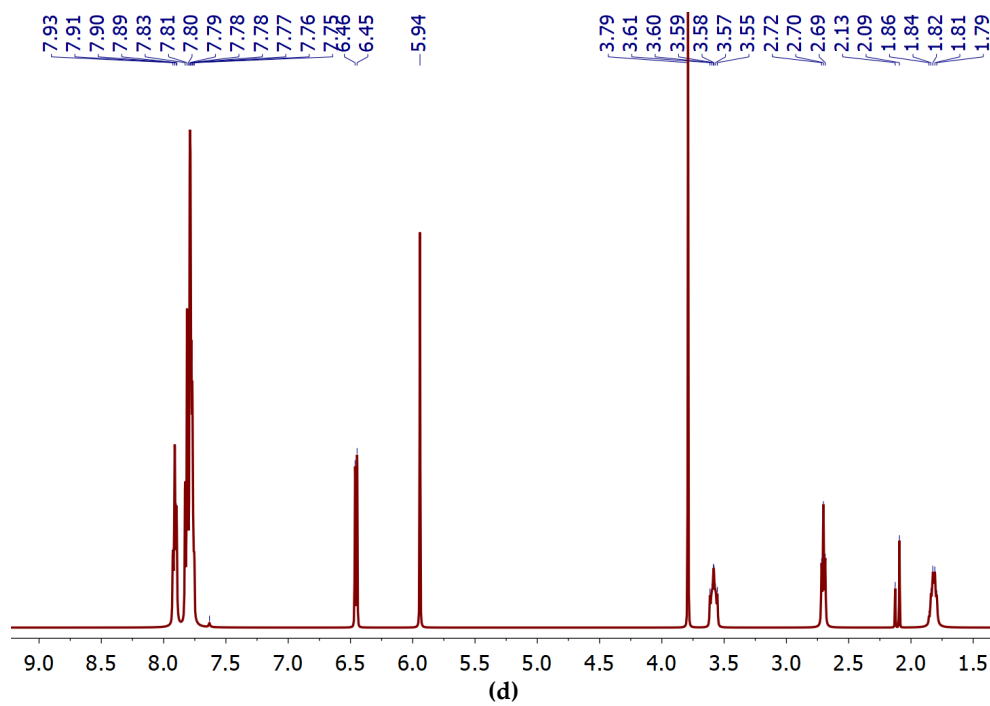

Supplement: s1 [file s1]
